# Supplementary material for: Rare Mutations in AHDC1 in Patients with Obstructive Sleep Apnea
Source: Hindawi journal article supplement (doi:10.1155/2019/5907361), 2019-10-13
Supplement: f1 [file 5907361.f1.pdf]

## Rare mutations in AHDC1 in Patients with Obstructive Sleep Apnea

### Appendix

#### DNA template preparation and amplification

DNA was extracted from 200 µl of blood according to the protocol provided in the QIAamp DNA Mini Kit (Qiagen, Hilden, Germany). The multiplex polymerase chain reaction (PCR) amplification strategy for DNA sequences was accomplished online (Ion Ampliseq™ Designer; <http://www.ampliseq.com>) to amplify the target region (for primer sequences, **Supplementary Table 3**). Then the maximum coverage design was chosen. A total of 10 ng of DNA per sample was used for enrichment by multiplex PCR, each DNA pool was amplified with the Ion Ampliseq™ Library Kit; the manufacturer's protocols were followed (Life Technologies, Darmstadt, Germany).

After each pool undergone 17 PCR cycles, the PCR primers were removed with FuPa Reagent (Life Technologies), next the amplicons were ligated to the sequencing adaptors with barcodes (Ion Xpress™ Barcode Adapters Kit; Life Technologies). After purification with AMPure XP beads (Beckman Coulter, Krefeld, Germany), the barcoded libraries were quantified with a Qubit® 2.0 Fluorimeter (Life Technologies), then the DNA was concentrated to 20 pmol/L using the Ion Library Equalizer™ Kit (Life Technologies). The IT OneTouch template kit on an IT OneTouch system (Life

Technologies) were used to clonally amplify the library DNA onto the Ion Sphere Particles (Life Technologies).

## **Sequencing**

Ion 318 Chip was used to carry copies of the DNA fragment. Sequencing was performed using the sequencing kit (Ion PGM Sequencing Kit; Life Technologies) according to the manufacturer's instructions with the 400-bp single-end run configuration.

**Supplementary Table 1** Detailed information of targeted sequencing panel

| GeneName | Locus         | OMIM number | Protein                                                                 | Coverage | Function                                                        | Ref |
|----------|---------------|-------------|-------------------------------------------------------------------------|----------|-----------------------------------------------------------------|-----|
| AHDC1    | 1p36.11-p35.3 | 615829      | A protein containing two AT-hooks, which likely function in DNA binding | 0.995    | Syndromic Expressive Language Delay, Hypotonia, and Sleep Apnea | [1] |

**Supplementary Table 2** AmpliSeq™ amplicons and coverage details of obstructive sleep apnea-targeted sequencing assay

| Target_ID | Gene  | Chr  | Chr_Start | Chr_End  | Total_Bases | Covered_Bases | Missed_Bases | Coverage |
|-----------|-------|------|-----------|----------|-------------|---------------|--------------|----------|
| 1919052   | AHDC1 | chr1 | 27860750  | 27861432 | 682         | 651           | 31           | 0.955    |
| 1919049   | AHDC1 | chr1 | 27873766  | 27878705 | 4939        | 4939          | 0            | 1        |
| 1919055   | AHDC1 | chr1 | 27879397  | 27879445 | 48          | 48            | 0            | 1        |
| 1919050   | AHDC1 | chr1 | 27879579  | 27879806 | 227         | 227           | 0            | 1        |
| 1919054   | AHDC1 | chr1 | 27884810  | 27885046 | 236         | 236           | 0            | 1        |
| 1919053   | AHDC1 | chr1 | 27885211  | 27885399 | 188         | 188           | 0            | 1        |
| 1919051   | AHDC1 | chr1 | 27929902  | 27930148 | 246         | 246           | 0            | 1        |

**Supplementary Table 3 Primers of panel**

| Ion_AmpliSeq_Fwd_Primer*          | Ion_AmpliSeq_Rev_Primer*           | Name  | Amplicon_Start | Amplicon_Stop |
|-----------------------------------|------------------------------------|-------|----------------|---------------|
| TACGGATGCTGTTGGCCAAA              | GATTGACATCATGAAGGACCTGACA          | AHDC1 | 27878092       | 27878255      |
| GCCAGGACGTCTGAGTACTC              | CGGAACGTGGTAGTGGTCTT               | AHDC1 | 27876777       | 27877045      |
| CCAGAGGATCAGCAAGAGGTTG            | CAGACAGCACTGATTACTCAGAACTT         | AHDC1 | 27877705       | 27877935      |
| GCCTTGCCCTTAAATCCTGCAT            | GCCCACTCCTTAGTGACTTGAC             | AHDC1 | 27873652       | 27874008      |
| GTACCCACCTTGCCTTCATAGG            | GAGCTTGATGGCAAGCATTTC              | AHDC1 | 27874173       | 27874507      |
| GTGGAAGCCTTGCCAAAGGT              | CCTCAGGCTACCCATCCAAAC              | AHDC1 | 27874535       | 27874857      |
| AGAGGACACTCTGGTTCCAGTT            | TCAGAGGCCTTTAGTCAGCTCTA            | AHDC1 | 27874954       | 27875266      |
| GTGCCCTTGGGTACCATGTAG             | GCCGGACAAAGCGTATTCCG               | AHDC1 | 27875406       | 27875701      |
| GTCTGAAGCGGCTGGAGTTA              | CCTCTTCACCGGCTACTTTTCG             | AHDC1 | 27875816       | 27876125      |
| GCTCTGGGAACAGAGTCCCAT             | CAAAGCAGGCGGTTTTGGT                | AHDC1 | 27876367       | 27876617      |
| CTTTGCGGGTAGAGACCACT              | CCTTGCGCCTGGACTTGT                 | AHDC1 | 27877231       | 27877542      |
| CGCCTCGGCTCACATTCT                | CCCTCCAGGTTTGCTATTGG               | AHDC1 | 27930066       | 27930247      |
| GCGTGGGTTCTCGGAGAAG               | TAAGGGACCTCCTGCTCTTCC              | AHDC1 | 27878441       | 27878731      |
| GTGGGCAACAAGACGGGCAATA            | CCCTACCTCACAGGATTGGTATGAA          | AHDC1 | 27879443       | 27879814      |
| CAGATCTCAGGCAGAAGGGAAAA           | CACTCTTTTGGGTTTTCTCTTCTGTTG        | AHDC1 | 27860610       | 27860894      |
| GGATATTGTTCATTTTGTCAAAC<br>GACCT  | GCACAAAACCAGCAATTGTAAATACTT<br>TTT | AHDC1 | 27861043       | 27861259      |
| TGATTCTGTAAAGAAGCTCTTTTT<br>GACCT | GCTTACCCTGTGTCCATGCTTA             | AHDC1 | 27885085       | 27885445      |

|                                  |                                    |       |          |          |
|----------------------------------|------------------------------------|-------|----------|----------|
| GCAGGCTTCATGTGTCAGTTCA           | GCCTTGATGACCTGAGAGAAGCTG           | AHDC1 | 27884619 | 27884975 |
| CCTGGCCTGTAAAGGGCTTA             | AGGACGAGCAGCAAGCTATG               | AHDC1 | 27875656 | 27875858 |
| GCATAAAGCCTGGGTACCTGTAG          | AAGGGCACAGCCTATTGGTAC              | AHDC1 | 27873916 | 27874243 |
| CTCTTCCTTGAAGCCCAGTGTA           | ACTTCATAGGACCCTACTCCATGAAC         | AHDC1 | 27874394 | 27874602 |
| TCAGGACTGTCCCTGGAACAGT           | ACTGGAACGAGGCATCATCTG              | AHDC1 | 27874695 | 27875007 |
| CGCTGACGTGGCAGTCAA               | AAGCAAGGCCTCCTTCTTCAG              | AHDC1 | 27875215 | 27875531 |
| AGATCGGAGGAGTCATCCGAAT           | CTGTGACTGGGAAGCCAAAG               | AHDC1 | 27876072 | 27876429 |
| CTCAAAGAAGTCACTGAAGGAGC<br>AT    | ATGGCCATGCCAGAGGTA AAA             | AHDC1 | 27876539 | 27876892 |
| GCTTACGTTTGAGAATAATGGGC<br>ATCT  | GTCCCAGAGTTGAAGCCGGAAT             | AHDC1 | 27876988 | 27877285 |
| CGACACAGGATCTTTGGCCTA            | CTGGACCCGCAGGCACTAGA               | AHDC1 | 27877443 | 27877780 |
| GAGGCCAGCTACTAAGGATG             | GCGACCTACAGTACAGCTTCTTC            | AHDC1 | 27877878 | 27878145 |
| TGTACACCACTGTGCTGCAG             | ACCTCCGGGAACCCAAGTA                | AHDC1 | 27878196 | 27878565 |
| CTGTCCAGGCATCGTTTCATTT           | CAGTCCTTGTCCAAAGTAGGTACTTTA<br>TAA | AHDC1 | 27879763 | 27879925 |
| CGTGCGCTGCACAAAAGAG              | CCGTGTCCAGCGGAGTTAG                | AHDC1 | 27929834 | 27930108 |
| GTGTGTCTGCCAACAGAAAAC            | CCCTGCAAGTATGCACTGAGAA             | AHDC1 | 27860835 | 27861103 |
| GGCCCAGTTTCACTTATTGACAG          | GGAATTCAGATCTATTGCCCGTCTT          | AHDC1 | 27879204 | 27879476 |
| AAGTATTTACAATTGCTGGTTTTG<br>TGCA | CCTGCCTCTTCTTGTGTTTCTT             | AHDC1 | 27861233 | 27861456 |
| TGAGTCCTGGTCATTGTCACAAC          | GGTCAAAAAGAGCTTCTTTACAGAATC        | AHDC1 | 27884917 | 27885112 |

|  |     |  |  |  |
|--|-----|--|--|--|
|  | AAA |  |  |  |
|--|-----|--|--|--|

Primers were designed using the Web based Ion AmpliSeq Designer software (<https://www.ampliseq.com>). This tool generates different primer design solutions, which differ for specificity, sample type, and application. After comparison of the primer design options, the design providing the maximum coverage was chosen.

Ion\_AmpliSeq\_Fwd\_Primer\*: Forward primer sequence.

Ion\_AmpliSeq\_Rev\_Primer\*: Reward primer sequence

**Supplementary Table 4** Characteristics between mutation and non-mutation group

| <b>Measure</b>            | <b>Mutation group</b> | <b>Non-mutation group</b> | <b>P</b> |
|---------------------------|-----------------------|---------------------------|----------|
| <b>Number of subjects</b> | 4                     | 353                       | -        |
| <b>Age (years)</b>        | 57.5 ± 5.20           | 54.68 ±11.55#             | 0.628    |
| <b>Sex(% male)</b>        | 75.00                 | 80.74                     | 0.578    |
| <b>BMI (kg/m2)</b>        | 25.07 ± 6.89          | 26.33 ± 3.80#             | 0.503    |

Data are expressed as mean ± standard deviation or n (%). The differences between groups were analyzed by the independent Student's t-test, Wilcoxon test or Fisher's exact tests.

#Data were asymmetrically distributed. \*P<0.05

BMI: body mass index,



**Supplementary Figure 1** Sanger sequencing chromatograms of variants in *AHDC1*.

1. *AHDC1* (c.-781C>G). chr1: 27879407 G C

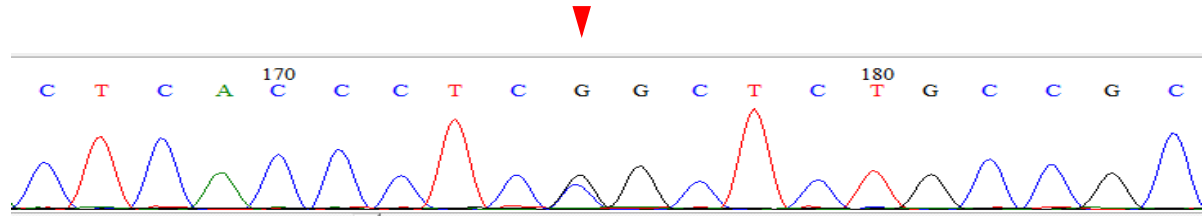

2. *AHDC1* (c.-88C>T). chr1: 27879416 C T

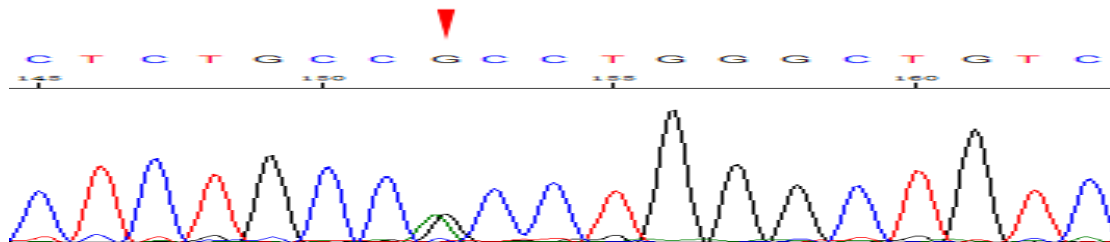

3. *AHDC1*: p.G1484D chr1: 27874176 C T

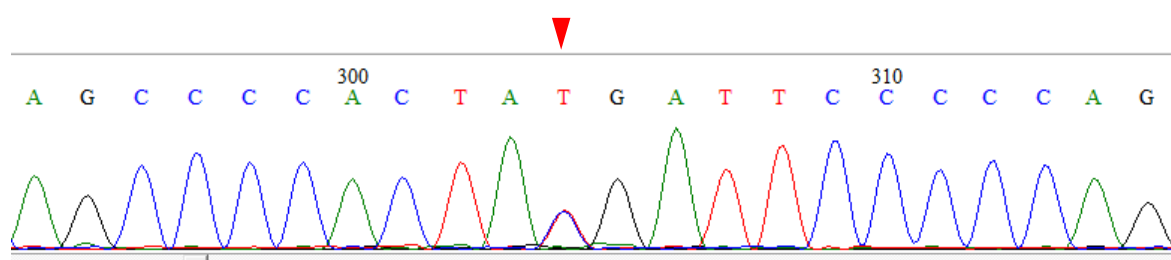

## Supplementary Figure 2 Analysis of potential transcriptional binding sites in the proximate promoter region

>NG\_034158.1:55380-56379 Homo sapiens AT-hook DNA binding motif containing 1 (AHDC1), RefSeqGene on chromosome 1 (1000-bp) the variant is at nt 55598

```
GACTGGCAGAGCCCCCAGGCACGGGGGCCCTCTCTCTTCCAGGTCAGCCGGGTGTCT
GCGCTGGACAGAGCGCTGAGGGAGCCGGGGTGGTACCTGGAGGAGGCTGGGCCGGT
GGCAGGGGTTGAGCTGTGGCCACCAGACCATTTGGGGAATTCAGATCTATTGCCCG
TCTTGTGTTGCCACAGAGATCTCCAGTGTGACAGCCCAGGCGGCAGAGCCGAGGGTGA
GTGGTGGGGTTCTCCTGGAGCCCTTTCGGGGTAAGAAGGAGGGAGGCCGTGCCCTT
GTTAGAACTTCCTGGCCTTCTCCTTAAGTTTGTATCACCCCTGCTGATGTGCTTCCCTC
TCAAAGGCAGGGGTCTGTTCTTCTGAGTGCATAGCCAGATTCCCAAAGGGGATGA
GCTGTCAATAAGTGAAACTGGGCCGGGCATGGTGGCTCACGCCTGTAATCCCAGTAT
TTTGGGAGGCTGAGGCAAGTGGATCATCTGAGGTCAGGAGCTCCAGACCAGCCTGGC
CAACTTGGTGAACCCCGTCTCTACTAAAATACAAAAATTAGCCAGGTGTGGTGGCG
CATGCCTGTAATCCCAGGTGCTTGGGAGGCTGACACCTGAGAATCGCTTGCACTAGG
AGGCGGAGGTTGCAGTGAGCTGAGATCACGCTGCTTCACTCTAGCCTGGGCGACAGA
GTGAGACTCTCTTCCAAAAAAGTGAAGTGGGCCCATGAGGGGCTCA
CTATACACATGGTGGTTTGGAGAAAGGCTGGGAGTCAGCAAGGGGATGGGGCTTGGGG
TGGGGAGGGGAGCTTGGTAAGGAGATGAGACCTCAGGAGGGAGGGGTCCAGGAGCTC
ATCAAGGATATGGGAAGCTGATGAGGATGTAGGTGTTTTCAGTAAGGGACCTCCTGCTC
TTCCTGCCTGGCAGGTCCTGGTCCCGGCTTCTCGCACCCCTCATGTTCAGCCCCGGCCC
CGCCCGGCGGCCTGCGGAGGACAAGGTCAGG
```

219 (-)

ccgagGGTGAg

The variant is at -219 or at +782

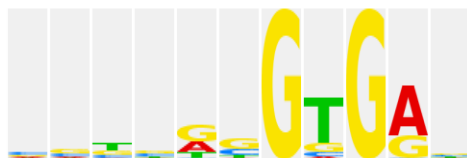

**Factor name:** SREBP-2

**Matrix:** [VSSREBP2\\_Q6\\_01](#)

**From:** 219 (-)

**To:** 229

**Matrix score:** 0.984

**Core score:** 1.000

**Sequence:** ccgagGGTGAg ([click to copy](#))

**Supplementary Figure 3** Analysis of sequence conservation in nine species of missense mutation identified in *AHDC1*.

AHDC1: p.G1484D

|           |           |           |            |
|-----------|-----------|-----------|------------|
|           | p.G1484D  |           |            |
|           | ↓         |           |            |
| EGKVG     | TG        | LL        | Human      |
| EGKVG     | TG        | LL        | Chimpanzee |
| - - - - - | - - - - - | - - - - - | Rhesus     |
| EGKVG     | TG        | LL        | Dog        |
| EGKVG     | S         | LL        | Mouse      |
| EGKVG     | S         | LL        | Rat        |
| - - - - - | - - - - - | - - - - - | Fugu       |
| - - - - - | - - - - - | - - - - - | Chicken    |
| - - - - - | - - - - - | - - - - - | Zebrafish  |

All variants were subjected to the sequence conservation analysis in nine species, including human (*Homo sapiens*), chimp (*Pan troglodytes*), rhesus (*Macaca mulatta*), dog (*Canis familiaris*), mouse (*Mus musculus*), rat (*Rattus norvegicus*), torafugu (*Takifugu rubripes*), chicken (*Gallus gallus*), and zebrafish (*Danio rerio*). The results showed that AHDC1:p.G1484D was evolutionarily conserved in vertebrates.

## References

[1] F. Xia, M. N. Bainbridge, T. Y. Tan et al., "De novo truncating mutations in AHDC1 in individuals with syndromic expressive language delay, hypotonia, and sleep apnea," *American journal of human genetics*, vol. 94, no. 5, pp. 784-789, 2014.
